# Supplementary material for: Different hotspot p53 mutants exert distinct phenotypes and predict outcome of colorectal cancer patients
Source: Research Square preprint supplement (doi:10.21203/rs.3.rs-523301/v1), 2021-06-04
Supplement: Supplementary file 3 [file 3fd13279681076419b3a5ee5.docx]

**Supplementary movies 1-3**

a-c, SW480 KO cells (a) and their derivatives stably expressing p53R175H (b) or p53R273H (c) were subjected to time lapse microscopy. Red arrows indicate cells undergoing cell spreading in the course of the 24 hours of the experiment.
