# Supplementary material for: Different hotspot p53 mutants exert distinct phenotypes and predict outcome of colorectal cancer patients
Source: Research Square preprint supplement (doi:10.21203/rs.3.rs-523301/v1), 2021-06-04
Supplement: Supplementary file 4 [file bef5b3a7f7c98ad91aaf848c.docx]

| **Table 1: CRC tumors harboring R175 or R273 mutation stratified by tumor stage** | | | |
| --- | --- | --- | --- |
|  |  |  |  |
| Sample | Study.of.origin | Tumor Stage | TP53 Status |
| 05CO044 | CPTAC-2 | II | R175H, S90Pfs*33 |
| 15CO002 | CPTAC-2 | II | R175H |
| 21CO006 | CPTAC-2 | I | R175H, HOMDEL |
| coadread_dfci_2016_112874 | DFCI | II | R175H |
| coadread_dfci_2016_1160 | DFCI | III | R175H |
| coadread_dfci_2016_1165 | DFCI | I | R175H |
| coadread_dfci_2016_1167 | DFCI | II | R175H |
| coadread_dfci_2016_1170 | DFCI | III | R175H |
| coadread_dfci_2016_1191 | DFCI | I | R273H, R175H |
| coadread_dfci_2016_1226 | DFCI | III | R175H |
| coadread_dfci_2016_1262 | DFCI | I | R175H |
| coadread_dfci_2016_132 | DFCI | II | R175H |
| coadread_dfci_2016_160282 | DFCI | II | R175G |
| coadread_dfci_2016_1745 | DFCI | I | R175H |
| coadread_dfci_2016_1803 | DFCI |  | R175H |
| coadread_dfci_2016_22 | DFCI | I | R175H |
| coadread_dfci_2016_229 | DFCI | I | R175H |
| coadread_dfci_2016_253 | DFCI | II | R175H |
| coadread_dfci_2016_2674 | DFCI | I | R175H |
| coadread_dfci_2016_2955 | DFCI | II | R175H |
| coadread_dfci_2016_295702 | DFCI | I | R175H |
| coadread_dfci_2016_2991 | DFCI | I | R175H |
| coadread_dfci_2016_3092 | DFCI | I | R175H |
| coadread_dfci_2016_3112 | DFCI | IV | C176Y, R175H |
| coadread_dfci_2016_3169 | DFCI | IV | R175H |
| coadread_dfci_2016_3194 | DFCI | IV | R175H |
| coadread_dfci_2016_3226 | DFCI | III | R175H |
| coadread_dfci_2016_3232 | DFCI | I | R175H |
| coadread_dfci_2016_3436 | DFCI | II | R175H |
| coadread_dfci_2016_3440 | DFCI | III | R175H |
| coadread_dfci_2016_3509 | DFCI | II | R175H |
| coadread_dfci_2016_353622 | DFCI | I | R175H |
| coadread_dfci_2016_3539 | DFCI |  | R175H |
| coadread_dfci_2016_3644 | DFCI | II | R175H |
| coadread_dfci_2016_3670 | DFCI | II | R175H |
| coadread_dfci_2016_3692 | DFCI | III | R175H |
| coadread_dfci_2016_378 | DFCI | II | R175H |
| coadread_dfci_2016_4503 | DFCI | I | R175H |
| coadread_dfci_2016_4536 | DFCI | III | R175H |
| coadread_dfci_2016_471 | DFCI | I | R175H |
| coadread_dfci_2016_475 | DFCI | III | C176Y, R175H |
| coadread_dfci_2016_485 | DFCI | I | R175H |
| coadread_dfci_2016_60 | DFCI | I | Q144*, R175C, R110C |
| coadread_dfci_2016_662 | DFCI |  | R175H |
| coadread_dfci_2016_693 | DFCI | II | R175H |
| coadread_dfci_2016_70 | DFCI | III | R175H |
| SP191880 | ICGC - COCA-CN | IVA | R306*, R175H |
| SP199436 | ICGC - COCA-CN | IIB | R175H |
| SP199694 | ICGC - COCA-CN | IIIC | R175H |
| SP191849 | ICGC - COCA-CN | IIB | R175H |
| SP128333 | ICGC - COCA-CN | IIB | R175H |
| SP129136 | ICGC - COCA-CN | III | R175H |
| SP128506 | ICGC - COCA-CN | IIIB | R175H |
| SP128802 | ICGC - COCA-CN | IIIB | R175H |
| SP133645 | ICGC - COCA-CN | IIIB | R175H |
| SP128305 | ICGC - COCA-CN | IIIB | R175H |
| SP134057 | ICGC - COCA-CN | IIIC | R175H |
| SP192608 | ICGC - COCA-CN | IIIC | R175H |
| SP128931 | ICGC - COCA-CN | IIIA | R175H |
| SP199413 | ICGC - COCA-CN | I | R175H |
| TCGA-AG-3725-01A | TCGA-READ | III | p.R175H |
| TCGA-DY-A1DC-01A | TCGA-READ | IIA | p.R175H |
| TCGA-EF-5831-01A | TCGA-READ | IIA | p.R175H |
| TCGA-F5-6811-01A | TCGA-READ | IIA | p.R175H |
| TCGA-F5-6813-01A | TCGA-READ | IIIC | p.R175H |
| TCGA-AG-3592-01A | TCGA-READ | IIA | p.R175H |
| TCGA-AG-A01N-01A | TCGA-READ | IV | p.R175H |
| TCGA-AF-3913-01A | TCGA-READ | IV | p.R175H |
| TCGA-AG-A020-01A | TCGA-READ | III | p.R175H |
| TCGA-AG-A016-01A | TCGA-READ | IV | p.R175H |
| TCGA-CI-6624-01C | TCGA-READ | I | p.R175H |
| TCGA-EI-6511-01A | TCGA-READ | IIIB | p.R175H |
| TCGA-AG-A00C-01A | TCGA-READ | IIIB | p.R175H |
| TCGA-AZ-6601-01A | TCGA-COAD | II | p.R175H, p.T125T |
| TCGA-AA-A010-01A | TCGA-COAD | IIB | p.R175C |
| TCGA-A6-6142-01A | TCGA-COAD | IVA | p.R175C |
| TCGA-WS-AB45-01A | TCGA-COAD | IIA | p.R175C |
| TCGA-DM-A1D8-01A | TCGA-COAD | not reported | p.R175H |
| TCGA-G4-6306-01A | TCGA-COAD | not reported | p.R175H |
| TCGA-AA-A01T-01A | TCGA-COAD | III | p.R175H |
| TCGA-A6-6650-01A | TCGA-COAD | IIA | p.R175H |
| TCGA-AA-3851-01A | TCGA-COAD | IIA | p.R175H |
| TCGA-AA-3862-01A | TCGA-COAD | IIA | p.R175H |
| TCGA-AY-6197-01A | TCGA-COAD | IIA | p.R175H |
| TCGA-AZ-4681-01A | TCGA-COAD | IIA | p.R175H |
| TCGA-D5-5540-01A | TCGA-COAD | IIA | p.R175H |
| TCGA-D5-6532-01A | TCGA-COAD | IIA | p.R175H |
| TCGA-D5-6541-01A | TCGA-COAD | IIA | p.R175H |
| TCGA-DM-A1D9-01A | TCGA-COAD | IIA | p.R175H |
| TCGA-F4-6854-01A | TCGA-COAD | IIA | p.R282W, p.R175H |
| TCGA-G4-6626-01A | TCGA-COAD | IIA | p.R175H |
| TCGA-AA-3968-01A | TCGA-COAD | I | p.R175H |
| TCGA-AZ-5407-01A | TCGA-COAD | I | p.R175H |
| TCGA-AA-3488-01A | TCGA-COAD | IV | p.R175H |
| TCGA-AA-A02F-01A | TCGA-COAD | IV | p.R175H |
| TCGA-AZ-6606-01A | TCGA-COAD | IV | p.R175H |
| TCGA-DM-A28H-01A | TCGA-COAD | IIIC | p.R175H |
| TCGA-QG-A5YV-01A | TCGA-COAD | IIIC | p.R175H |
| TCGA-G4-6298-01A | TCGA-COAD | IIIB | p.R175H |
| TCGA-G4-6310-01A | TCGA-COAD | IIIB | p.R175H |
| GECCO_0092 | GECCO | Stage 4 or distant | R175H |
| GECCO_0116 | GECCO | Stage 1 or local | R175H |
| GECCO_0162 | GECCO | Stage 1 or local | R175H |
| GECCO_0415 | GECCO | Stage 4 or distant | R175H |
| GECCO_0480 | GECCO | Stage 1 or local | R175H |
| GECCO_0529 | GECCO | Stage 1 or local | R175H |
| GECCO_1096 | GECCO | Stage 4 or distant | R175H |
| GECCO_2011 | GECCO | Stage 1 or local | R175H |
| GECCO_2041 | GECCO | Stage 1 or local | R175H |
| GECCO_2049 | GECCO | Stage 1 or local | R175C |
| GECCO_2064 | GECCO | Stage 1 or local | R175H |
| GECCO_2091 | GECCO | Stage 1 or local | R175C |
| GECCO_2094 | GECCO | Stage 1 or local | R175H |
| GECCO_2162 | GECCO | Stage 1 or local | R175H |
| GECCO_2179 | GECCO | Stage 1 or local | R175H |
| GECCO_2191 | GECCO | Stage 1 or local | R175H |
| GECCO_2275 | GECCO | Stage 1 or local | R175H |
| GECCO_2337 | GECCO | Stage 1 or local | R175H |
| GECCO_2373 | GECCO | Stage 1 or local | R175H |
| GECCO_2420 | GECCO | Stage 4 or distant | R175H |
| GECCO_2497 | GECCO | Stage 1 or local | R175H |
| GECCO_2506 | GECCO | Stage 1 or local | R175H |
| GECCO_2515 | GECCO | Stage 1 or local | R175H |
| GECCO_2577 | GECCO | Stage 1 or local | R175H |
| GECCO_2583 | GECCO | Stage 1 or local | R175H |
| GECCO_3057 | GECCO | Stage 1 or local | R175H |
| GECCO_3364 | GECCO | Stage 1 or local | R175H |
| GECCO_3399 | GECCO | Stage 4 or distant | R175H |
| GECCO_6118 | GECCO | Stage 1 or local | R175H |
| GECCO_6150 | GECCO | Stage 1 or local | R175H |
| GECCO_6290 | GECCO | Stage 1 or local | R175H |
| GECCO_6465 | GECCO | Stage 1 or local | R175H |
| GECCO_6515 | GECCO | Stage 1 or local | R175H |
| GECCO_6573 | GECCO | Stage 1 or local | R175H |
| GECCO_6613 | GECCO | Stage 4 or distant | R175H |
| GECCO_6661 | GECCO | Stage 1 or local | R175H |
| GECCO_6687 | GECCO | Stage 1 or local | R175H |
| GECCO_6717 | GECCO | Stage 4 or distant | R175H |
| 01CO014 | CPTAC-2 | III | R273C |
| 05CO028 | CPTAC-2 | I | R273C |
| 05CO047 | CPTAC-2 | I | R273H |
| 06CO001 | CPTAC-2 | III | R273C |
| 09CO014 | CPTAC-2 | II | R273C, HOMDEL |
| 11CO039 | CPTAC-2 | II | R273H |
| 11CO079 | CPTAC-2 | III | R273C |
| coadread_dfci_2016_1191 | DFCI | I | R273H, R175H |
| coadread_dfci_2016_1772 | DFCI | III | R273C |
| coadread_dfci_2016_1804 | DFCI | III | R273H |
| coadread_dfci_2016_186 | DFCI | II | R273H |
| coadread_dfci_2016_2260 | DFCI | III | R273C |
| coadread_dfci_2016_2266 | DFCI |  | R273H |
| coadread_dfci_2016_2279 | DFCI | II | R273H |
| coadread_dfci_2016_236849 | DFCI | III | R273C, R306* |
| coadread_dfci_2016_237969 | DFCI | I | R273H |
| coadread_dfci_2016_2621 | DFCI | I | R273G |
| coadread_dfci_2016_2641 | DFCI | II | R273C |
| coadread_dfci_2016_280091 | DFCI | III | R273C, V122Dfs*26, R158S |
| coadread_dfci_2016_293 | DFCI | II | R273C |
| coadread_dfci_2016_2976 | DFCI | III | R273C, R282W |
| coadread_dfci_2016_3038 | DFCI | I | R273H |
| coadread_dfci_2016_3079 | DFCI | I | R273L |
| coadread_dfci_2016_3108 | DFCI | III | R273H |
| coadread_dfci_2016_3116 | DFCI | II | R273C |
| coadread_dfci_2016_3330 | DFCI | III | R273C |
| coadread_dfci_2016_3442 | DFCI | III | R273C |
| coadread_dfci_2016_3484 | DFCI | II | R273H |
| coadread_dfci_2016_3601 | DFCI | III | R273C |
| coadread_dfci_2016_3610 | DFCI |  | R273H |
| coadread_dfci_2016_3632 | DFCI | II | R273C, R273H |
| coadread_dfci_2016_412 | DFCI | IV | R273C |
| coadread_dfci_2016_418 | DFCI | IV | R273C |
| coadread_dfci_2016_4514 | DFCI | II | R273C |
| coadread_dfci_2016_628 | DFCI |  | R273C |
| coadread_dfci_2016_680 | DFCI |  | R273C |
| SP128465 | ICGC - COCA-CN | IV | R273H, P72R |
| SP199321 | ICGC - COCA-CN | IVB | R273C |
| SP192043 | ICGC - COCA-CN | IVA | R273C |
| SP191902 | ICGC - COCA-CN | IVA | R273C |
| SP192635 | ICGC - COCA-CN | IV | R273C |
| SP128564 | ICGC - COCA-CN | IV | R273C |
| SP128964 | ICGC - COCA-CN | IIIC | R273C |
| SP133671 | ICGC - COCA-CN | IIIC | R273C |
| SP191960 | ICGC - COCA-CN | IVA | R273H |
| SP193146 | ICGC - COCA-CN | IIB | R273H |
| SP199307 | ICGC - COCA-CN | IIB | R273H |
| SP128867 | ICGC - COCA-CN | III | R273H |
| SP192426 | ICGC - COCA-CN | III | R273P |
| SP128392 | ICGC - COCA-CN | IIIB | R273H |
| SP192514 | ICGC - COCA-CN | IIIB | R273H |
| SP128898 | ICGC - COCA-CN | IIIC | R273H |
| SP133741 | ICGC - COCA-CN | IIIC | R273H |
| SP134103 | ICGC - COCA-CN | IIIC | R273H |
| TCGA-EI-6506-01A | TCGA-READ | IIA | p.R337S, R273C |
| TCGA-CI-6621-01A | TCGA-READ | IIIB | p.R273C |
| TCGA-EI-6507-01A | TCGA-READ | IIA | p.R273C |
| TCGA-EI-6514-01A | TCGA-READ | IIA | p.R273C |
| TCGA-AF-3914-01A | TCGA-READ | IIIB | p.R273C |
| TCGA-AG-3742-01A | TCGA-READ | I | p.R273H |
| TCGA-DY-A1DF-01A | TCGA-READ | IIIC | p.R273H |
| TCGA-CL-5917-01A | TCGA-READ | IIIC | p.R273H |
| TCGA-AG-3902-01A | TCGA-READ | IIA | p.R273H |
| TCGA-AG-4022-01A | TCGA-READ | II | p.R273H |
| TCGA-AM-5821-01A | TCGA-COAD | IIA | p.R273C |
| TCGA-A6-6138-01A | TCGA-COAD | I | p.R273C |
| TCGA-D5-6540-01A | TCGA-COAD | I | p.R273C |
| TCGA-5M-AAT4-01A | TCGA-COAD | IV | p.R273C |
| TCGA-AA-A02K-01A | TCGA-COAD | IV | p.R273C |
| TCGA-AA-3844-01A | TCGA-COAD | IIIC | p.R273C |
| TCGA-AY-4070-01A | TCGA-COAD | IIIC | p.R273C |
| TCGA-RU-A8FL-01A | TCGA-COAD | IIIB | p.R273C |
| TCGA-D5-6531-01A | TCGA-COAD | IIA | p.R273H |
| TCGA-CM-6163-01A | TCGA-COAD | I | p.R273H |
| TCGA-AA-3655-01A | TCGA-COAD | II | p.R273H |
| TCGA-AA-3660-01A | TCGA-COAD | II | p.R273H |
| TCGA-A6-A567-01A | TCGA-COAD | IV | p.R273H |
| TCGA-NH-A8F8-01A | TCGA-COAD | IV | p.R273H |
| TCGA-AY-6196-01A | TCGA-COAD | IIIC | p.R273H |
| TCGA-4N-A93T-01A | TCGA-COAD | IIIB | p.R273H |
| TCGA-AA-3949-01A | TCGA-COAD | IIIB | p.R273H |
| TCGA-D5-5541-01A | TCGA-COAD | IIIB | p.R273H |
| TCGA-D5-6926-01A | TCGA-COAD | IIIB | p.R273H |
| TCGA-NH-A50V-01A | TCGA-COAD | IIIB | p.R273H |
| GECCO_0040 | GECCO | Stage 1 or local | R273H |
| GECCO_0048 | GECCO | Stage 1 or local | R273H |
| GECCO_0094 | GECCO | Stage 4 or distant | R273C |
| GECCO_0181 | GECCO | Stage 1 or local | R273C |
| GECCO_0226 | GECCO | Stage 1 or local | R273C |
| GECCO_0321 | GECCO | Stage 1 or local | R273H |
| GECCO_0414 | GECCO | Stage 4 or distant | R273H |
| GECCO_0421 | GECCO | Stage 1 or local | R273C |
| GECCO_0445 | GECCO | Stage 1 or local | R273C |
| GECCO_0483 | GECCO | Stage 4 or distant | R273H |
| GECCO_0494 | GECCO | Stage 1 or local | R273H |
| GECCO_0528 | GECCO | Stage 1 or local | R273C |
| GECCO_0632 | GECCO | Stage 1 or local | R273H |
| GECCO_0687 | GECCO | Stage 1 or local | R273H |
| GECCO_2104 | GECCO | Stage 1 or local | R273C |
| GECCO_2206 | GECCO | Stage 1 or local | R273H |
| GECCO_2264 | GECCO | Stage 1 or local | R273C |
| GECCO_2311 | GECCO | Stage 1 or local | R273C |
| GECCO_2346 | GECCO | Stage 1 or local | R273C |
| GECCO_2421 | GECCO | Stage 1 or local | R273H |
| GECCO_2453 | GECCO | Stage 1 or local | R273H |
| GECCO_2619 | GECCO | Stage 1 or local | R273C |
| GECCO_3043 | GECCO | Stage 1 or local | R273H |
| GECCO_3123 | GECCO | Stage 1 or local | R273C |
| GECCO_3376 | GECCO | Stage 4 or distant | R273H |
| GECCO_3502 | GECCO | Stage 1 or local | R273C |
| GECCO_6005 | GECCO | Stage 1 or local | R273H |
| GECCO_6061 | GECCO | Stage 4 or distant | R273C |
| GECCO_6206 | GECCO | Stage 4 or distant | R273H |
| GECCO_6219 | GECCO | Stage 1 or local | R273H |
| GECCO_6242 | GECCO | Stage 1 or local | R273H |
| GECCO_6249 | GECCO | Stage 1 or local | R273C |
| GECCO_6376 | GECCO | Stage 4 or distant | R273C |
| GECCO_6442 | GECCO | Stage 1 or local | R273C |
| GECCO_6485 | GECCO | Stage 1 or local | R273C |
| GECCO_6523 | GECCO | Stage 4 or distant | R273H |
| GECCO_6562 | GECCO | Stage 1 or local | R273H |
| GECCO_6608 | GECCO | Stage 1 or local | R273H |
| GECCO_6616 | GECCO | Stage 1 or local | R273H |
| GECCO_6616 | GECCO | Stage 1 or local | R273H |
| GECCO_6630 | GECCO | Stage 4 or distant | R273H |
| GECCO_6688 | GECCO | Stage 4 or distant | R273C |
| GECCO_6692 | GECCO | Stage 4 or distant | R273H |

| **Table 2: Univariate and multivariate analyses of overall survival in CRC tumors**  **with mutations in R175 vs mutations in R273 (Cox proportional regression model).** | | | | | | |
| --- | --- | --- | --- | --- | --- | --- |
|  |  |  |  |  |  |  |
|  |  |  |  |  |  |  |
|  |  |  |  |  |  |  |
|  | **Univariate analysis** | | | **Multivariate analysis** | | |
| **Factor** | HR | 95% CI | *p*-value | HR | 95% CI | *p*-value |
| R273/R175 mutation | 2.596 | 1.309-5.152 | 0.0046* | 2.291 | 1.133-4.631 | 0.02* |
| Male/Female | 2.28 | 1.204-4.318 | 0.009* | 1.958 | 1.022-3.751 | 0.042* |
| Age at diagnosis | 1.004 | 0.975-1.-035 | 0.8 | 1.009 | 0.978-1.041 | 0.571 |
| *KRAS* mutation Yes/No | 1.302 | 0.694-2.439 | 0.4 | 1.203 | 0.638-2.262 | 0.568 |
| Rectal/colon | 0.994 | 0.501-1.974 | 1 | 0.953 | 0.477-1.905 | 0.893 |

| **Table 3: Univariate and multivariate analyses of overall survival in CRC tumors**  **with high R273 signature vs low R273 signature (Cox proportional regression model).** | | | | | | | | |
| --- | --- | --- | --- | --- | --- | --- | --- | --- |
|  |  |  | |  | |  |  | |  |
|  |  |  | |  | |  |  | |  |
|  |  |  | |  | |  |  | |  |
|  | **Univariate analysis** | | | | **Multivariate analysis** | | | |
| **Factor** | HR | 95% CI | *p-value* | | HR | | 95% CI | *p-value* |
| High signature/Low signature expression | 2.169 | 1.276-3.687 | 0.003* | | 2.314 | | 1.344-3.977 | 0.002* |
| Male/Female | 0.988 | 0.593-1.645 | 0.964 | | 1.067 | | 0.631-1.803 | 0.807 |
| Age at diagnosis | 0.98 | 0.996-1.044 | 0.1 | | 1.022 | | 0.998-1.047 | 0.06 |
| KRAS mutation Yes/No | 0.677 | 0.391-1.174 | 0.2 | | 0.64 | | 0.367-1.114 | 0.11 |
| Rectal/colon | 0.653 | 0.330-1.291 | 0.2 | | 0.658 | | 0.330-1.310 | 0.234 |

| **Table 4: List of primers used in this study** | |
| --- | --- |
|  |  |
| **Primers for RT-qPCR** | **Sequence** |
| *GAPDH* _fw | GGAAGGTGAAGGTCGGAGTC |
| *GAFDH* _rv | TGAGGTCAATGAAGGGGTCA |
| *TP53* _fw | CCAAGCAATGGATGATTTGA |
| *TP53*_rv | GGCATTCTGGGAGCTTCATCT |
| *ACTA2* _fw | AAGATCCTGACTGAGCGTGG |
| *ACTA2* _rv | GCAGTGGCCATCTCATTTTC |
| *ECM1* _fw | ACACAAACCGCCTAGAGTGTG |
| *ECM1* _rv | AACACAAGTGGTGGTGGGTC |
| *APOE* _fw | GGAAGATGAAGGTTCTGTGGG |
| *APOE* _rv | TCTGCCACTCGGTCTGCT |
| *CDC42EP5* _fw | CGAGAGGGGCTGACACTTTA |
| *CDC42EP5* _rv | CTCCGTCTCCTAATCCCCG |
| *MRC2* _fw | ATGTGTGCAAGAAGAAGCCC |
| *MRC2* _rv | CTCGCACTCCACCTTCACAT |
| *ITGA7* _fw | GTTGGGAGTCAGTGTTCGGA |
| *ITGA7* _rv | AGCAGCGACCAATCATATCC |
|  |  |
| **Primers for CHIP** | Sequence |
| *ITGA7*_Regulatory element_fw | AAGGAGCGACTCTGGAGGGA |
| *ITGA7*_Regulatory element_rv | GTGGTTTCAGGCCTCCAAGAAG |
| *APOE*_Regulatory element_fw | CGTTGCTGGTCACATTCCTGG |
| *APOE*_Regulatory element_rv | GCAGCACAGAAGCCTCAGAAG |
| *ITGA7*_Intronic_fw | CTCCTTCTGCCTCCAATGCT |
| *ITGA7*_Intronic_rv | AGAGGCGTTGAGGTTTGTCC |
| *APOE*_Intronic_fw | AATGCATTGCAGGCAGATAGTG |
| *APOE*_Intronic_rv | GTGTGGGGGTGATGGAGAATA |
